# Supplementary material for: Modelling the luminescence of iridium cyclometalated complexes encapsulated in cucurbituril
Source: Royal Society of Chemistry journal article supplement (doi:10.1039/c7an01632h), 2017-12-04
Supplement: c7an01632h1.pdf [file c7an01632h1.pdf]

# Modelling the Luminescence of Iridium Cyclometalated Complexes Encapsulated in Cucurbituril

*Lubna R. Alrawashdeh<sup>#</sup>, Michael P. Cronin, Anthony I. Day, Lynne Wallace\* and  
Clifford E. Woodward\**

School of Physical, Environmental and Mathematical Sciences, UNSW Australia,  
Australian Defence Force Academy, Canberra, Australia.

<sup>#</sup>Current address: University of Tabuk, Tabuk, Saudi Arabia.

## Supporting Information.

### Experimental

The description of the preparation and instrumental methods were given in a previous publication. We will summarize only those experimental aspects which are directly relevant to the current study.

#### <sup>1</sup>H NMR spectroscopy

NMR spectra (1D and 2D) were recorded on a Varian Unity plus-400 spectrometer (operating at 400 MHz for the <sup>1</sup>H nuclei. All NMR experiments were conducted at 25 °C. <sup>1</sup>H NMR spectra were referenced to tetramethylsilane (TMS) (0 ppm) at 25 °C using the residual <sup>1</sup>H signal of the respective deuterated solvent. Sodium acetate buffer solution (0.05 M, pH 4.7) in D<sub>2</sub>O was used as solvent in

most experiments. Solid Q[10] was dissolved in deuterated sodium acetate buffer, with heating and sonication used to speed the dissolution. Aliquots of Q[10] stock solution were added into a solution to give a 1:1 molar ratio. Concentrations of species in NMR experiments were ~1 mM.

## Luminescence Studies

### *Time-resolved luminescence*

Luminescence lifetimes were determined using an Edinburgh Instruments FLS980 fluorescence spectrometer equipped with a pulsed EPLED excitation source (360 nm). Exponential Tail Fit Analysis was used to fit the emission decay, with  $\chi^2$  values and intensity residuals used to determine goodness of fit. For all fitting results reported here,  $\chi^2$  values were close to unity. All samples were prepared in the sodium acetate buffer solution and were deoxygenated by purging with argon or nitrogen. Quantum yields were measured in a deaerated sodium acetate buffer solution (pH 4.7) at 360 nm excitation wavelength, using optically dilute method with one single point measurement.<sup>27</sup> In the single point method, the quantum yield of the unknown ( $\Phi$ ) was calculated using the following equation:

$$\Phi = \Phi_R (I/I_R)(A_R/A)(\eta^2/\eta_R^2) \quad (1)$$

Where  $\Phi_R$  is the quantum yield of the reference compound; I,  $I_R$  are the integrated emission intensities of unknown and reference; A,  $A_R$  are the absorbances of unknown and reference at the excitation wavelength ( $\lambda_{ex}$ );  $\eta$ ,  $\eta_R$  are the refractive indices of the solvents. A deaerated  $[\text{Ru}(\text{bpy})_3]^{2+}$  water solution ( $\Phi_R = 0.042$ ,  $\lambda_{ex} = 360$  nm) was used as reference. Refractive index for sodium acetate buffer is 1.34.<sup>28</sup>

### *Steady-State Titrations.*

Steady-state luminescence spectra were recorded on a Horiba Jobin Yvon FluoroMax-3 fluorescence spectrophotometer at room temperature unless otherwise specified. Samples were excited at 360 nm in quartz cuvettes (1 cm path length). Both Q[10] and the relevant iridium complex were dissolved in sodium acetate buffer solution (0.05 M, pH 4.7). Aliquots of Q[10] stock solution were then added to a stock solution of **Ir-X**. **Ir-X** initial concentrations and volumes, and Q[10] stock concentrations and total volume added were as follows: **Ir-CHO**:  $1.0 \times 10^{-5}$  M, 2.0 mL, Q[10]  $3.4 \times 10^{-5}$  M, 720  $\mu\text{L}$ ; **Ir-CH<sub>2</sub>NH<sub>2</sub><sup>+</sup>Bu**,  $7.6 \times 10^{-6}$  M, 3 mL Q[10]  $4.8 \times 10^{-5}$  M,

390  $\mu\text{L}$ ; **Ir-H**  $1.2 \times 10^{-5}$  M, 2.5 mL, Q[10]  $1.3 \times 10^{-4}$  M, 380  $\mu\text{L}$ ; **Ir-DMB** ( $2.6 \times 10^{-6}$  M, 2 mL, Q[10]  $2.9 \times 10^{-5}$  M, 385  $\mu\text{L}$ ).

### Derivation of model titration curve.

The total fluorescence of the **Ir-X** + Q[10] mixture is given by

$$F = \Phi k^a [M]_{tot}$$

where  $k^a$  is the absorption rate,  $\Phi$  is the quantum yield and  $[M]_{tot}$  is the total concentration of metal complex (which is fixed during the titration). Defining,

$\Delta F = F - F_0$  where,  $F_0$ , is the intensity of the free complex, we have

$$\frac{\Delta F}{F_0} \approx \frac{\Phi k^a [M]_{tot}}{k_f^r k^a [M]_{tot}} = \frac{\Phi}{k_f^r}$$

where  $k_f^r$  is the radiative rate of the free complex and we have assumed that  $F \gg F_0$ . The expression for the quantum yield is given in the main text by

$$\Phi \approx \frac{c_1 x_1 + c_2 x_2}{f} \quad (15a)$$

$$f = 1 + c_3 [M_f] \quad (15b)$$

and thus we have

$$\frac{\Delta F}{F_0} \approx \frac{c_1 x_1 + c_2 x_2}{f}$$

where,  $c_i k_f^r = c_i'$  ( $i = 1, 2$ ).
